# Supplementary material for: Redox‐Flow Batteries: From Metals to Organic Redox‐Active Materials
Source: PubMed Central journal article supplement — Angew Chem Int Ed Engl. 2016 Nov 7;56(3):686–711. doi: 10.1002/anie.201604925 (PMC5248651; doi:10.1002/anie.201604925), 2016-11-07
Supplement: ANIE-56-686-s001.pdf [file ANIE-56-686-s001.pdf]

Supporting Information

**Redox-Flow Batteries: From Metals to Organic Redox-Active Materials**

*Jan Winsberg<sup>+</sup>, Tino Hagemann<sup>+</sup>, Tobias Janoschka, Martin D. Hager, and Ulrich S. Schubert\**

anie\_201604925\_sm\_miscellaneous\_information.pdf

Extended Data Table: Utilized redox-active materials.

| Anode                                                                       | Cathode                                                                                        | Electrolyte                                                                                                | Theoretical cell voltage / V | Current density / mA cm <sup>-2</sup> | Theoretic energy density / Wh L <sup>-1</sup> | Maximal observed energy density / Wh L <sup>-1</sup> | Cycles reported | Membrane     | Ref.  |
|-----------------------------------------------------------------------------|------------------------------------------------------------------------------------------------|------------------------------------------------------------------------------------------------------------|------------------------------|---------------------------------------|-----------------------------------------------|------------------------------------------------------|-----------------|--------------|-------|
| <b>1. Flow batteries utilizing organic/inorganic redox-active materials</b> |                                                                                                |                                                                                                            |                              |                                       |                                               |                                                      |                 |              |       |
| Cd/CdSO <sub>4</sub><br>(single flow)                                       | 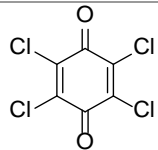<br>Chloranil | H <sub>2</sub> SO <sub>4</sub> /<br>(NH <sub>4</sub> ) <sub>2</sub> SO <sub>4</sub> /<br>CdSO <sub>4</sub> | 1.14                         | 10                                    | -                                             | -                                                    | 100             | None         | [131] |
| Pb/PbSO <sub>4</sub>                                                        | <br>Tiron     | H <sub>2</sub> SO <sub>4</sub>                                                                             | 1.1                          | 10                                    | -                                             | 2.8                                                  | 10              | Nafion 115   | [133] |
| Li                                                                          | <br>15D3GAQ  | LiPF <sub>6</sub> /PC                                                                                      | 2.3                          | 0.1 to 10                             | 25                                            | 25 <sup>a</sup>                                      | 9 to 40         | PP separator | [138] |



| Anode                                                                     | Cathode                                                                                                                                                                           | Electrolyte                                                             | Theoretical cell voltage / V | Current density / mA cm <sup>-2</sup> | Theoretic energy density / Wh L <sup>-1</sup>                          | Maximal observed energy density / Wh L <sup>-1</sup> | Cycles reported | Membrane                 | Ref.  |
|---------------------------------------------------------------------------|-----------------------------------------------------------------------------------------------------------------------------------------------------------------------------------|-------------------------------------------------------------------------|------------------------------|---------------------------------------|------------------------------------------------------------------------|------------------------------------------------------|-----------------|--------------------------|-------|
| Zn                                                                        | 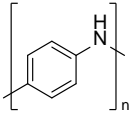<br>PANI                                                                                         | ZnCl <sub>2</sub> /NH <sub>4</sub> Cl                                   | 1.1                          | 10 to 30                              | 66.5                                                                   | 9.5                                                  | 32              | PP micro porous membrane | [35]  |
| LiNi <sub>0.33</sub> Mn <sub>0.33</sub> Co <sub>0.33</sub> O <sub>2</sub> | <br>Poly(vinylbenzyl ethyl viologen)                                                             | LiBF <sub>4</sub> /CH <sub>3</sub> CN                                   | 1.11                         | 0.2 mA ( current)                     | 15.5 <sup>a</sup><br>(14 Ah L <sup>-1</sup> volumetric energy density) | 15.5 <sup>a</sup>                                    | 11              | PP/PE separator          | [36]  |
| Half-cell only                                                            | <br>Poly(norbornene)-g-poly(4-methacryloyloxy-2,2,6,6-tetramethylpiperidin-1-oxyl) (PNB-g-PTMA) | (C <sub>4</sub> H <sub>9</sub> ) <sub>4</sub> NClO <sub>4</sub> /EC/DEC | Half-cell-only               | -                                     | -                                                                      | 0.94 <sup>a</sup>                                    | 2               | PP/PE separator          | [166] |

| Anode                                                                                                             | Cathode                                                                                                         | Electrolyte                                                                                                                                                                                            | Theoretical cell voltage / V | Current density / mA cm <sup>-2</sup> | Theoretic energy density / Wh L <sup>-1</sup> | Maximal observed energy density / Wh L <sup>-1</sup> | Cycles reported | Membrane                                                                      | Ref.  |
|-------------------------------------------------------------------------------------------------------------------|-----------------------------------------------------------------------------------------------------------------|--------------------------------------------------------------------------------------------------------------------------------------------------------------------------------------------------------|------------------------------|---------------------------------------|-----------------------------------------------|------------------------------------------------------|-----------------|-------------------------------------------------------------------------------|-------|
| Hybrid Zn(II)/Zn(0)                                                                                               | 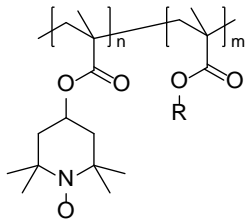<br>TEMPO containing polymers  | Zn(ClO <sub>4</sub> ) <sub>2</sub> × 6H <sub>2</sub> O/<br>EC/DMC/<br>DEC<br>or ZnCl <sub>2</sub> ,<br>NH <sub>4</sub> Cl/wat<br>er<br>or NaCl,<br>ZnCl <sub>2</sub> ,<br>NH <sub>4</sub> Cl/wat<br>er | 1.69                         | 0.5 to 20                             | 8.1                                           | 4.1                                                  | 1,000           | Dialysis membrane (regenerated cellulose, MWCO of 1.000 g mol <sup>-1</sup> ) | [32]  |
| Hybrid Zn(II)/Zn(0)                                                                                               | <br>TEMPO containing polymers | Zn(ClO <sub>4</sub> ) <sub>2</sub> × 6H <sub>2</sub> O/<br>EC/DMC/<br>DEC<br>or ZnCl <sub>2</sub> ,<br>NH <sub>4</sub> Cl/wat<br>er<br>or NaCl,<br>ZnCl <sub>2</sub> ,<br>NH <sub>4</sub> Cl/wat<br>er | 1.69                         | 0.5 to 20                             | 1.6                                           | 0.8                                                  | 1,000           | Dialysis membrane (regenerated cellulose, MWCO of 1.000 g mol <sup>-1</sup> ) | [33]  |
| <b>3. RFBs based on organic/halogen redox-active materials</b>                                                    |                                                                                                                 |                                                                                                                                                                                                        |                              |                                       |                                               |                                                      |                 |                                                                               |       |
| <br>AQDS (ADQSH <sub>2</sub> ) | Br <sub>2</sub>                                                                                                 | HBr/H <sub>2</sub> SO <sub>4</sub><br>(aq)                                                                                                                                                             | 0.81                         | 200 to 500                            | -                                             | 9.4                                                  | 15              | Nafion 212                                                                    | [78]  |
| AQDS (ADQSH <sub>2</sub> )                                                                                        | Br <sub>2</sub>                                                                                                 | HBr/H <sub>2</sub> SO <sub>4</sub><br>(aq)                                                                                                                                                             | 0.85                         | 250 to 750                            | -                                             | 9.4                                                  | 106 to 750      | Nafion 115                                                                    | [168] |

| Anode                                                                                            | Cathode         | Electrolyte                                                                  | Theoretical cell voltage / V                                                                                    | Current density / mA cm <sup>-2</sup> | Theoretic energy density / Wh L <sup>-1</sup>       | Maximal observed energy density / Wh L <sup>-1</sup> | Cycles reported | Membrane                         | Ref.  |
|--------------------------------------------------------------------------------------------------|-----------------|------------------------------------------------------------------------------|-----------------------------------------------------------------------------------------------------------------|---------------------------------------|-----------------------------------------------------|------------------------------------------------------|-----------------|----------------------------------|-------|
| AQDS (ADQSH <sub>2</sub> )                                                                       | Br <sub>2</sub> | HBr/H <sub>2</sub> SO <sub>4</sub><br>(aq)                                   | 0.85                                                                                                            | >4000                                 | -                                                   | -                                                    | -               | Nafion 212                       | [127] |
| AQDS (ADQSH <sub>2</sub> )                                                                       | Br <sub>2</sub> | HBr/H <sub>2</sub> SO <sub>4</sub><br>(aq)                                   | 0.75                                                                                                            | 100 to 1000                           | -                                                   | 5.2                                                  | 5 to 40         | Nafion 115                       | [170] |
| <b>4. RFBs utilizing low molar mass organic redox-active materials for catholyte and anolyte</b> |                 |                                                                              |                                                                                                                 |                                       |                                                     |                                                      |                 |                                  |       |
|                                                                                                  |                 |                                                                              |                                                                                                                 |                                       |                                                     |                                                      |                 |                                  |       |
|                                                                                                  |                 | CH <sub>3</sub> CN/TE<br>ABF <sub>4</sub> or<br>EC/PC/<br>TEABF <sub>4</sub> | ~2.8                                                                                                            |                                       | -                                                   | -                                                    | -               | PP separator                     | [173] |
|                                                                                                  |                 | CH <sub>3</sub> CN/<br>toluene                                               | 1.76; 2.72<br>(for the 1 <sup>st</sup><br>and<br>2 <sup>nd</sup> respective<br>oxidations<br>and<br>reductions) | 0.67 (2 mA<br>charging current)       | -                                                   | 1.00                                                 | 6               | Medium<br>porosity<br>glass frit | [28]  |
|                                                                                                  |                 | CH <sub>3</sub> CN                                                           | 1.73                                                                                                            | 20                                    | 9 (during<br>charging)<br>5 (during<br>discharging) | 8.00                                                 | 15, 35,<br>100  | Daramic<br>porous<br>separator   | [174] |
|                                                                                                  |                 | NaClO <sub>4</sub> /<br>CH <sub>3</sub> CN                                   | 1.6                                                                                                             | 0.35                                  | -                                                   | 1.7                                                  | 20              | Nepem 117                        | [129] |

| Anode                                                                                                         | Cathode                                                                                                  | Electrolyte                        | Theoretical cell voltage / V                           | Current density / mA cm <sup>-2</sup> | Theoretic energy density / Wh L <sup>-1</sup> | Maximal observed energy density / Wh L <sup>-1</sup> | Cycles reported | Membrane                         | Ref.  |
|---------------------------------------------------------------------------------------------------------------|----------------------------------------------------------------------------------------------------------|------------------------------------|--------------------------------------------------------|---------------------------------------|-----------------------------------------------|------------------------------------------------------|-----------------|----------------------------------|-------|
| 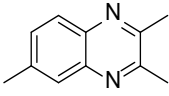<br><b>TMeQ</b>              | <br><b>DBBB</b>         | LiBF <sub>4</sub> /PC              | 1.12; 1.44<br>(TMeQ shows two reversible redox events) | 0.0625                                | -                                             | 1.1                                                  | 30              | Nafion 117                       | [159] |
| <br><b>AQS</b>               | <br><b>BQDS</b>         | H <sub>2</sub> SO <sub>4(aq)</sub> | 0.97                                                   | 2 to 10                               | -                                             | 1.25                                                 | 12              | Nafion 117                       | [128] |
| <br><b>TMeQ</b>              | <br><b>BCF3EPT</b>      | LiBF <sub>4</sub> /PC              | 1.1; 1.4<br>(TMeQ shows two reversible redox events)   | 0.14 (0.1 mA charging current)        | -                                             | 0.84 to 5.91                                         | 50 to 100       | Nafion 117                       | [184] |
| <br><b>FL</b>                | <br><b>ANL-8</b>        | TEA-TFSI/CH <sub>3</sub> CN        | 2.37                                                   | 10 to 15                              | 15 (for charging)<br>11 (for discharging)     | 13.63                                                | 100             | Micro porous PE/silica separator | [136] |
| <br><b>Methyl viologen</b> | <br><b>4-HO-TEMPO</b> | NaCl/H <sub>2</sub> O              | 1.25                                                   | 20 to 100                             | 8.4                                           | 6.9                                                  | 100             | “Selemin” AEM                    | [199] |
| <br><b>ARS</b>             | <br><b>BQDS</b>       | H <sub>2</sub> SO <sub>4(aq)</sub> | 0.83                                                   | 20 to 60                              | -                                             | 0.38                                                 | 3               | Nafion 212                       | [161] |

| Anode                                                                                           | Cathode                                                                            | Electrolyte                | Theoretical cell voltage / V | Current density / mA cm <sup>-2</sup>             | Theoretic energy density / Wh L <sup>-1</sup> | Maximal observed energy density / Wh L <sup>-1</sup> | Cycles reported                           | Membrane                          | Ref.      |
|-------------------------------------------------------------------------------------------------|------------------------------------------------------------------------------------|----------------------------|------------------------------|---------------------------------------------------|-----------------------------------------------|------------------------------------------------------|-------------------------------------------|-----------------------------------|-----------|
| <b>5. RFBs utilizing polymer-based organic redox-active materials for catholyte and anolyte</b> |                                                                                    |                            |                              |                                                   |                                               |                                                      |                                           |                                   |           |
|                                                                                                 | 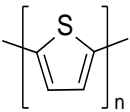  | TEABF <sub>4</sub> /P<br>C | 2.5                          | 0.5 to 5 (static cell);<br>0.2 to 1 (pumped cell) | -                                             | 3.2 (static cell);<br>2.7 (pumped cell)              | 30 (static cell);<br>20 (pumped cell)     | FAP-PP-375 AEM                    | [132]     |
|                |   | NaCl/H <sub>2</sub> O      | 1.1                          | 20 (static cell)<br>20 to 100 (pumped cell)       | 10.8                                          | 5.5                                                  | 10,000 (static cell)<br>~95 (pumped cell) | Cellulose-based dialyses membrane | [34, 186] |
|                                                                                                 |  | PC                         | 2.2 V                        | 0.25 mA (current)                                 | 0.3                                           | 0.07                                                 | 100                                       | Cellulose-based dialyses membrane | [187]     |

a) The energy density was calculated excluding the anolyte, due to a hybrid flow setup. In case no further information like the capacity [Ah L<sup>-1</sup>] are available, the maximal observed energy density [Wh L<sup>-1</sup>] was calculated by the following equation: energy density = (concentration of the electrolyte solution × 26.8 Ah L<sup>-1</sup> for one-electron redox-reaction × average cell voltage [V])/2.
